# Supplementary material for: Not Seeing the Mites for the Hairs. Comment on Möth et al. Unexpected Effects of Local Management and Landscape Composition on Predatory Mites and Their Food Resources in Vineyards. Insects 2021, 12, 180
Source: MDPI journal article supplement (doi:10.3390/insects12080671), 2021-07-26

Supplementary files to

**Not Seeing the Mites for the Hairs. Comment on Möth et al. Unexpected Effects of Local Management and Landscape Composition on Predatory Mites and Their Food Resources in Vineyards. *Insects* 2021, 12, 180**

**Peter Schausberger\***

Department of Behavioral and Cognitive Biology, University of Vienna, Althanstrasse 14, 1090 Vienna, Austria

\*Correspondence: [peter.schausberger@univie.ac.at](mailto:peter.schausberger@univie.ac.at)

**Table S1.** Erect and prostrate hair grades of the 32 vineyards paired within 16 circles, each having a 500 m radius, sampled by Möth et al. (2021) [1]. Erect and prostrate hair grades of the leaf blade and the main veins given in the OIV catalogue [19] were summed (minimum sum is 2, maximum is 18); in case of a variety-typical range of grades given in [19], the specifications of [20] were additionally considered to select the best matching grades for this variety in Austria. Due to rarity of cases in prostate hair grades 12 and 14, these cases were included in grade 10 for analyses.

| Circle | Vineyard |                  | Pest<br>management | Hair grade (leaf age) |                      |                   |                       |
|--------|----------|------------------|--------------------|-----------------------|----------------------|-------------------|-----------------------|
|        | ID       | Variety          |                    | Erect<br>(young)      | Prostrate<br>(young) | Erect<br>(mature) | Prostrate<br>(mature) |
| 1      | AODc_1   | Blauburger       | Organic            | 2                     | 8                    | 2                 | 8                     |
| 2      | AODc_2   | Grüner Veltliner | Organic            | 6                     | 10                   | 4                 | 8                     |
| 3      | AOLc_3   | Chardonnay       | Organic            | 2                     | 6                    | 4                 | 6                     |
| 4      | AODc_4   | Blaufränkisch    | Organic            | 6                     | 2                    | 6                 | 2                     |
| 5      | AOLc_5   | Weissburgunder   | Organic            | 2                     | 6                    | 2                 | 6                     |
| 6      | AODc_6   | Grüner Veltliner | Organic            | 6                     | 10                   | 4                 | 8                     |
| 7      | AODc_7   | Zweigelt         | Organic            | 8                     | 2                    | 10                | 2                     |
| 8      | AODc_8   | Blaufränkisch    | Organic            | 6                     | 2                    | 6                 | 2                     |
| 9      | AOLc_9   | Weissburgunder   | Organic            | 2                     | 6                    | 2                 | 6                     |
| 10     | AODc_10  | Chardonnay       | Organic            | 2                     | 6                    | 4                 | 6                     |
| 11     | AOLc_11  | Welschriesling   | Organic            | 6                     | 8                    | 6                 | 8                     |
| 12     | AOLc_12  | Welschriesling   | Organic            | 6                     | 8                    | 6                 | 8                     |
| 13     | AOLc_13  | Weissburgunder   | Organic            | 2                     | 6                    | 2                 | 6                     |
| 14     | AOLc_14  | Blaufränkisch    | Organic            | 6                     | 2                    | 6                 | 2                     |
| 15     | AODc_15  | Blaufränkisch    | Organic            | 6                     | 2                    | 6                 | 2                     |
| 16     | AOLc_16  | Blauburger       | Organic            | 2                     | 8                    | 2                 | 8                     |
|        |          | Cabernet         |                    |                       |                      |                   |                       |
| 1      | ACDc_1   | Sauvignon        | Integrated         | 8                     | 10                   | 8                 | 10                    |
| 2      | ACDc_2   | Blaufränkisch    | Integrated         | 6                     | 2                    | 6                 | 2                     |
| 3      | ACDc_3   | Blaufränkisch    | Integrated         | 6                     | 2                    | 6                 | 2                     |
| 4      | ACDc_4   | Blaufränkisch    | Integrated         | 6                     | 2                    | 6                 | 2                     |

|    |         |                  |            |    |    |    |    |
|----|---------|------------------|------------|----|----|----|----|
|    |         | Cabernet         |            |    |    |    |    |
| 5  | ACLC_5  | Sauvignon        | Integrated | 8  | 10 | 8  | 10 |
| 6  | ACLC_6  | Zweigelt         | Integrated | 8  | 2  | 10 | 2  |
| 7  | ACLC_7  | Grüner Veltliner | Integrated | 6  | 10 | 4  | 8  |
| 8  | ACLC_8  | Welschriesling   | Integrated | 6  | 8  | 6  | 8  |
| 9  | ACLC_9  | Grüner Veltliner | Integrated | 6  | 10 | 4  | 8  |
| 10 | ACDc_10 | Zweigelt         | Integrated | 8  | 2  | 10 | 2  |
| 11 | ACLC_11 | Chardonnay       | Integrated | 2  | 6  | 4  | 6  |
| 12 | ACLC_12 | Sauvignon Blanc  | Integrated | 4  | 10 | 8  | 10 |
| 13 | ACDc_13 | Zweigelt         | Integrated | 8  | 2  | 10 | 2  |
| 14 | ACDc_14 | Blaufränkisch    | Integrated | 6  | 2  | 6  | 2  |
| 15 | ACLC_15 | Furmint          | Integrated | 10 | 10 | 10 | 10 |
| 16 | ACDc_16 | Blauburger       | Integrated | 2  | 8  | 2  | 8  |

---

## Supplementary figures

**Figure S1.** Explanatory variables (**S1.a** nominal variables (mean  $\pm$  SE) - (A) date, (B) erect hair grade of the leaf underside, (C) vegetation type, (D) pest management regime; **S1.b** continuous variable (linear regression  $\pm$  95% CI) - percent vineyards in the surrounding of the target vineyard) significantly influencing phytoseiid mite abundance in vineyards.

**Figure S2.** Explanatory variables (**S2.a** nominal variables (mean  $\pm$  SE) - (A) date, (B) vegetation type, (C) erect hair grade of the leaf underside, (D) prostrate hair grade of the leaf underside; **S2.b** continuous variable (linear regression  $\pm$  95% CI) - percent vineyards in the surrounding of the target vineyard) significantly influencing eriophyid mite abundance in vineyards.

**Figure S3.** Explanatory variables - (A) date, (B) vegetation type - significantly influencing tydeid mite abundance (mean  $\pm$  SE) in vineyards.

**Figure S4.** Explanatory variables - (A) date, (B) erect hair grade on the leaf underside - significantly influencing pollen deposition (mean  $\pm$  SE) in vineyards.

Figure S1.a

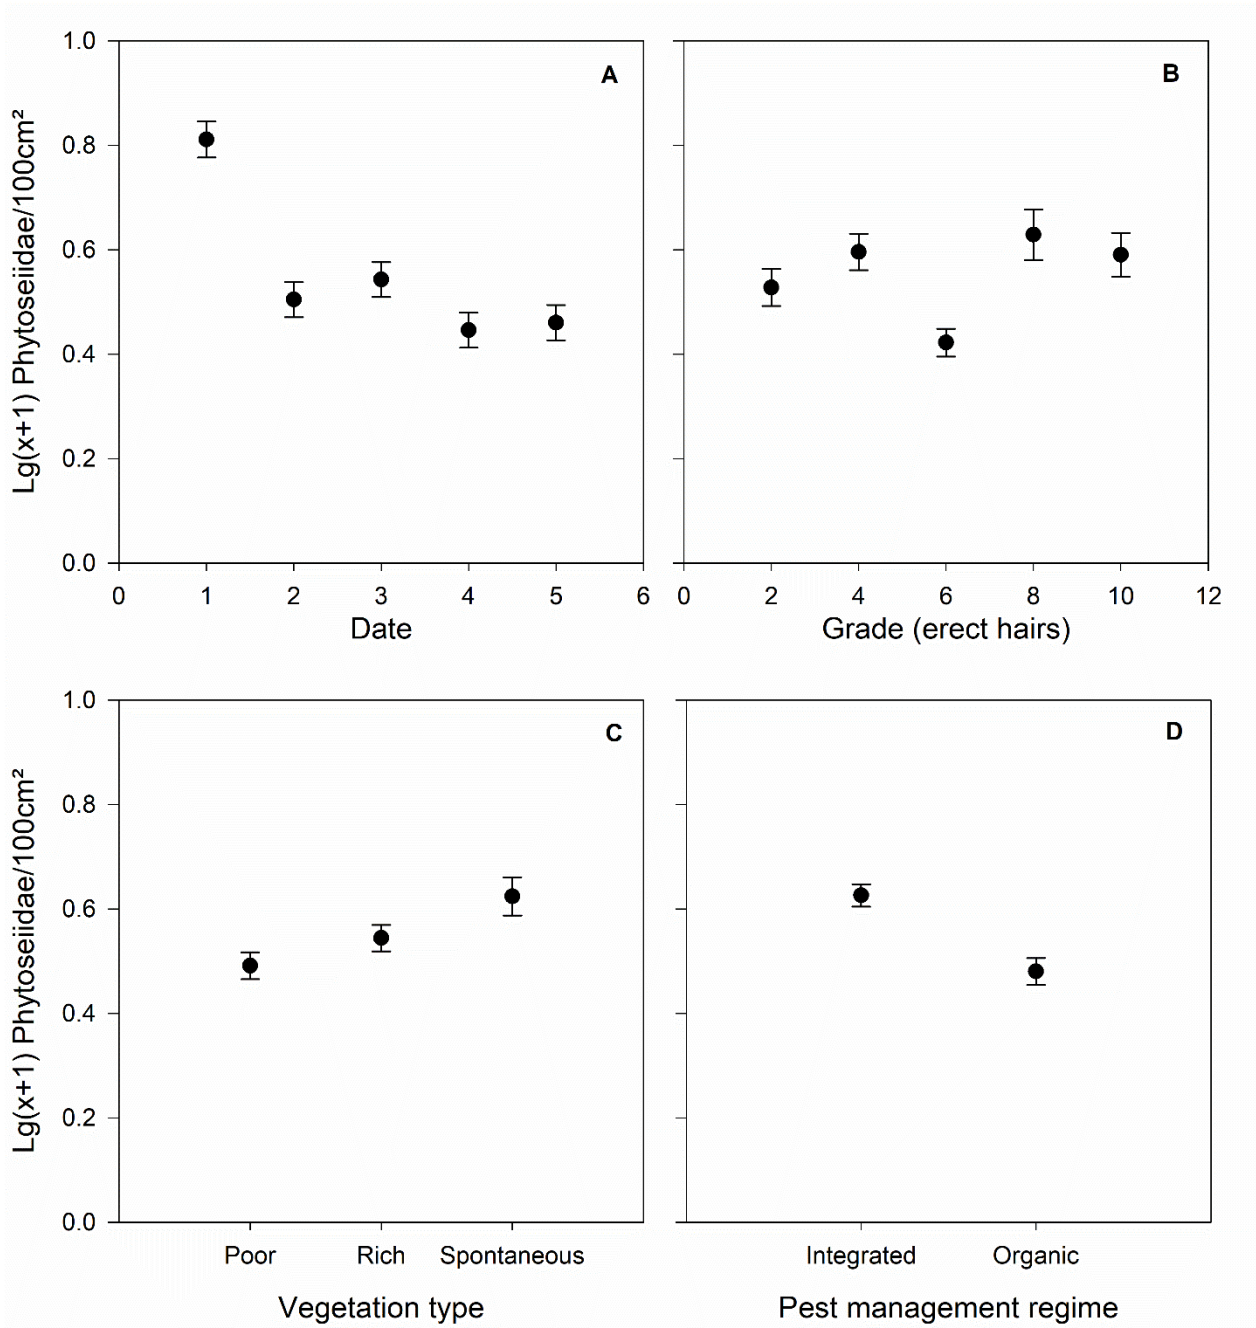

Figure S1.b

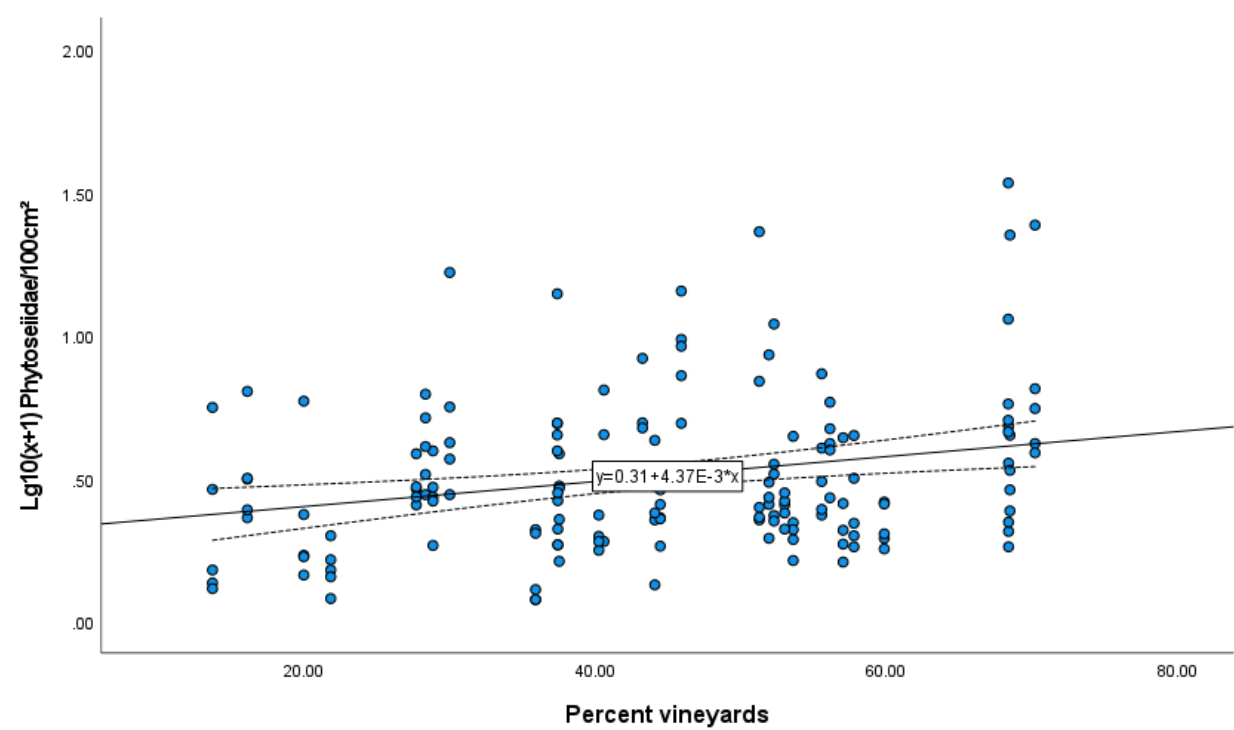

Figure S2.a

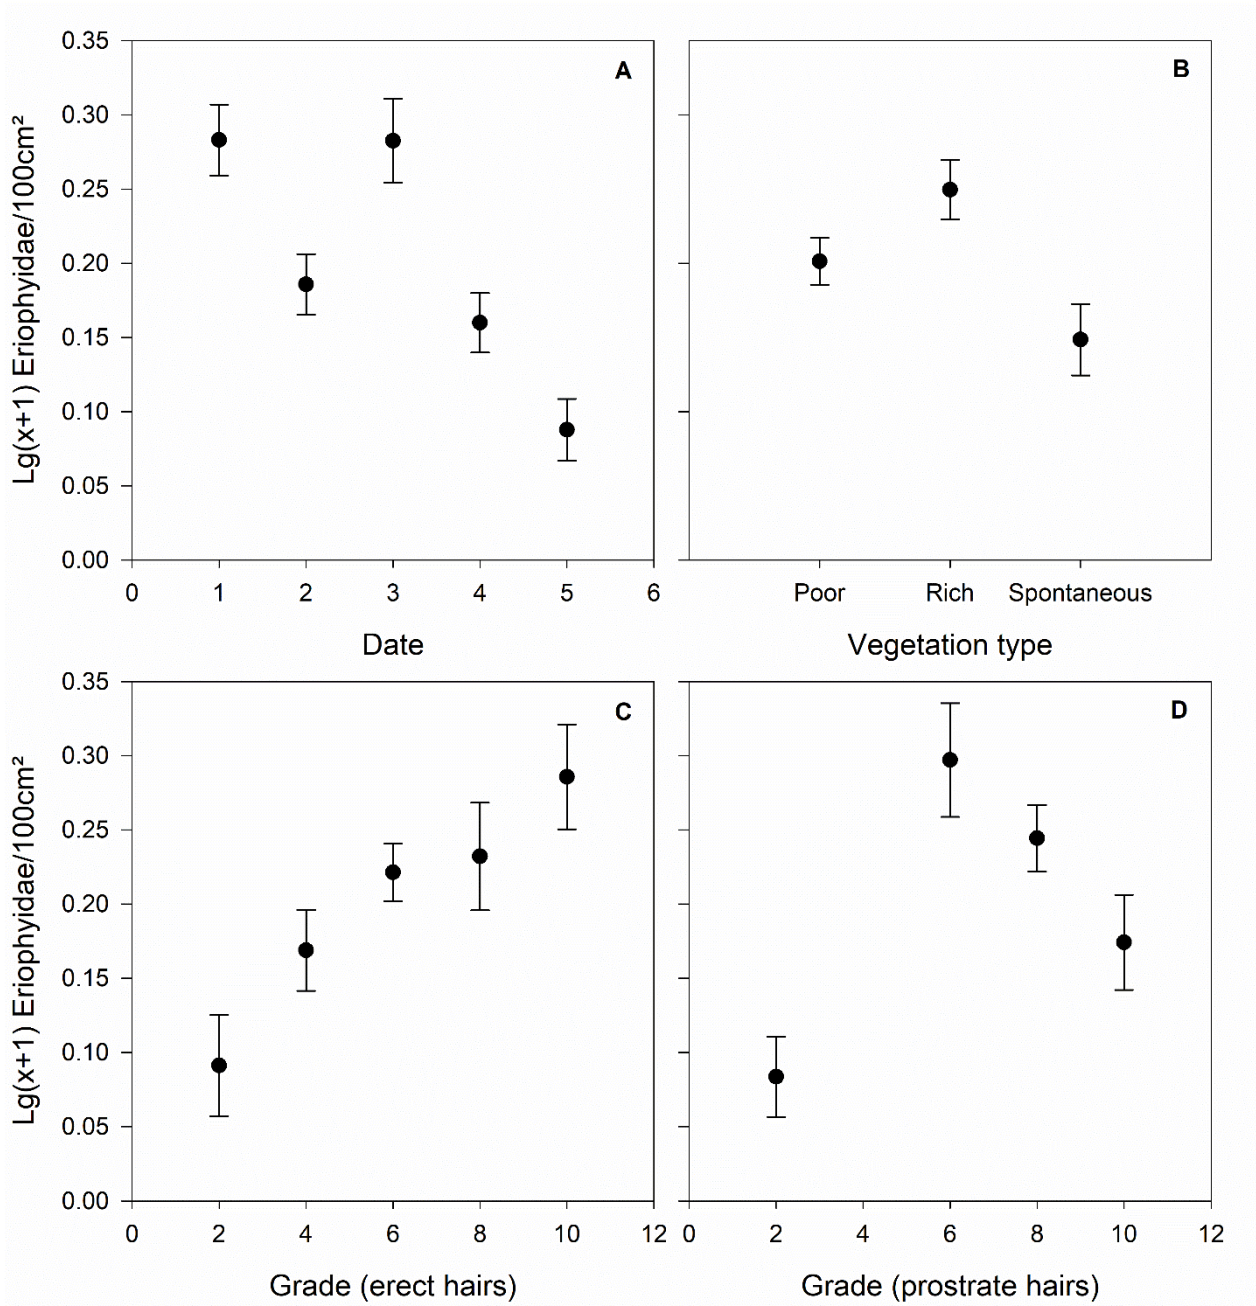

Figure S2.b

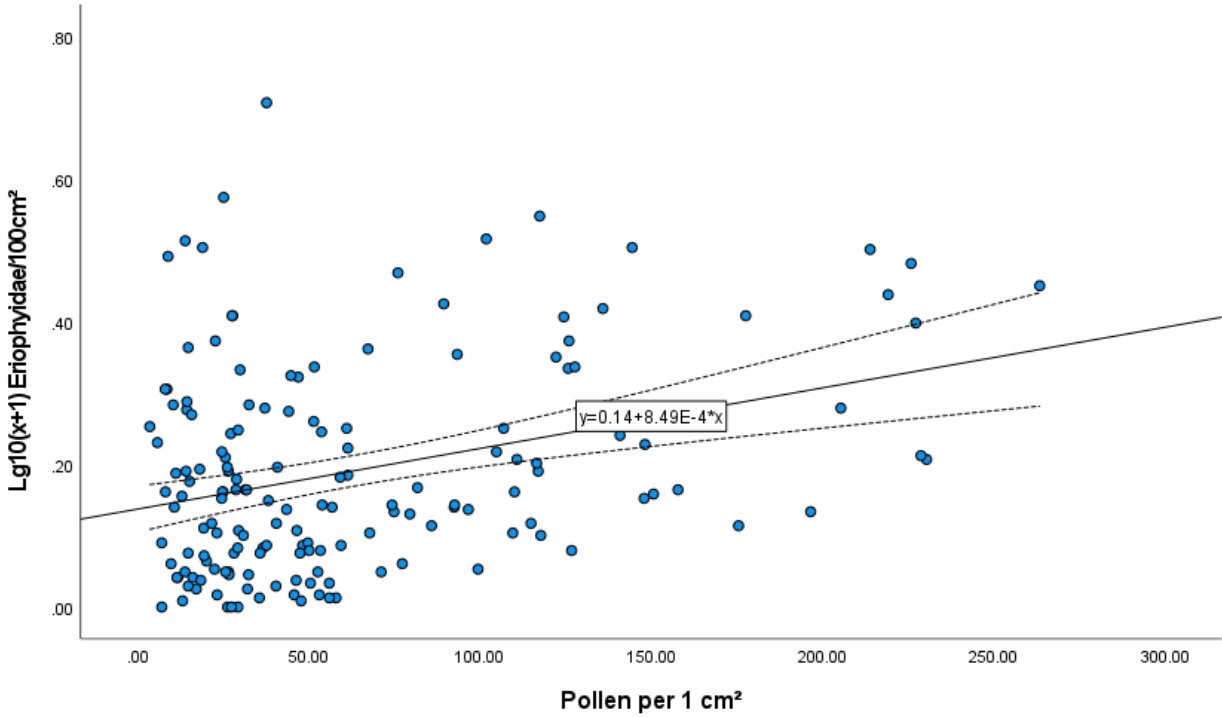



Figure S3

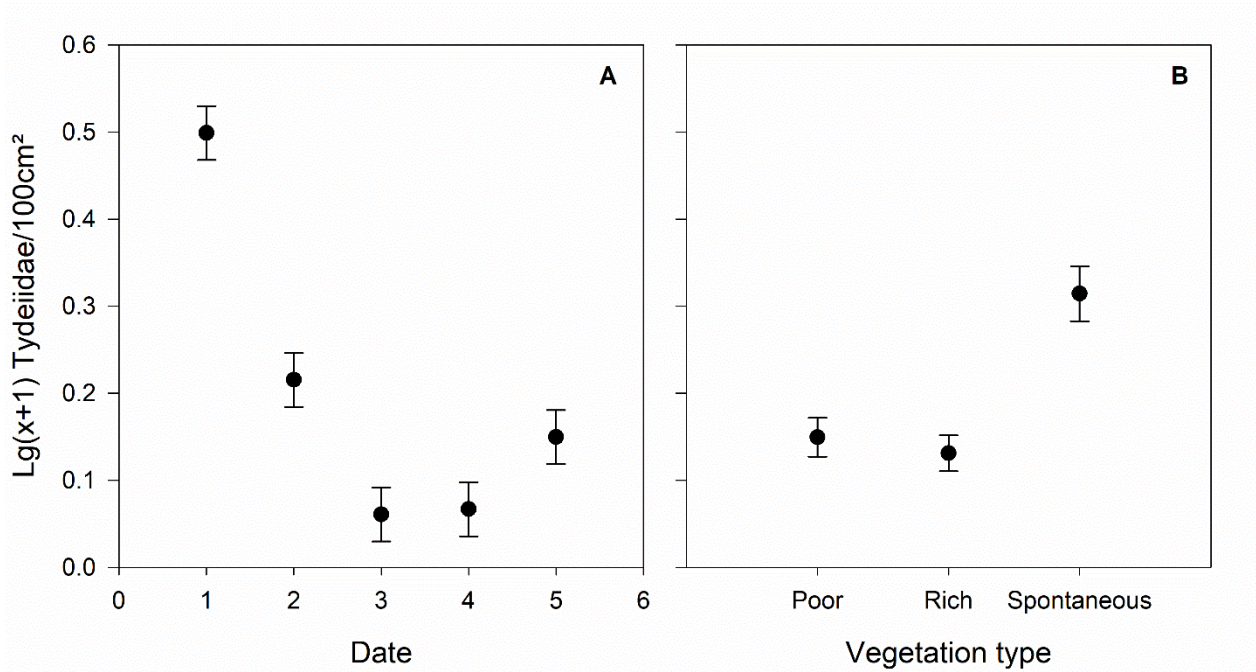

Figure S4

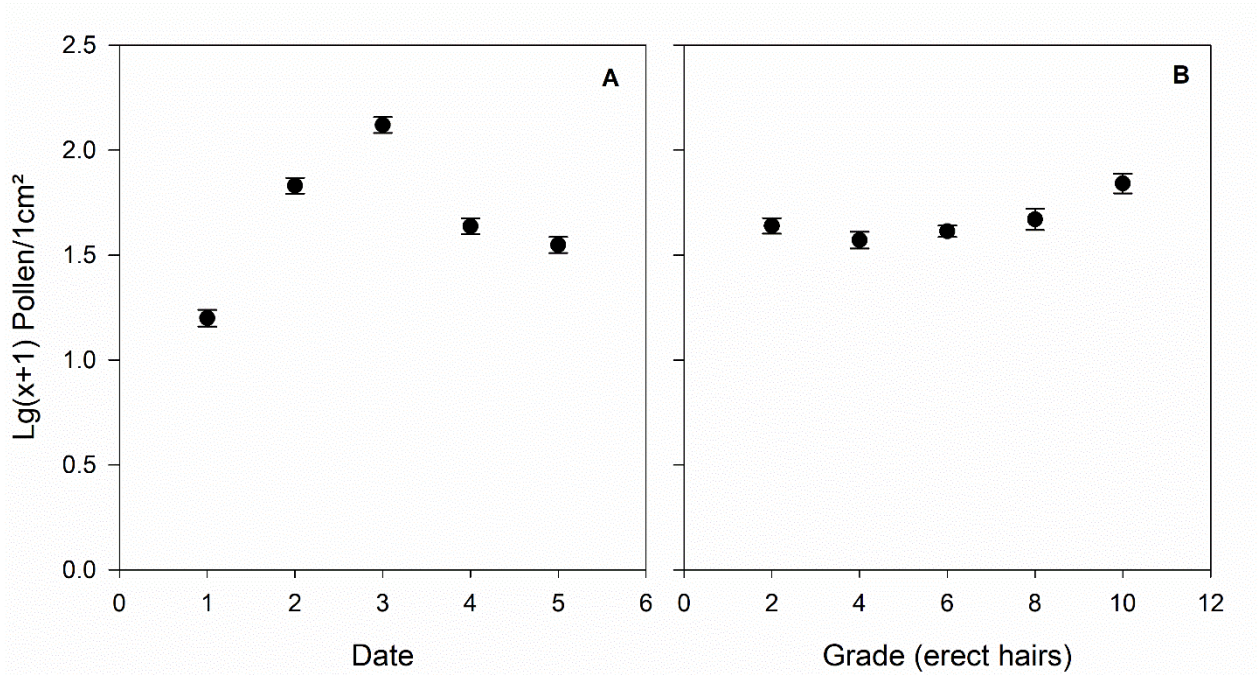

Supplement: s1 [file s1]
